# Supplementary material
Source: HighWire-hosted journal article supplement (https://bmjopen.bmj.com/content/15/2/e082955)
Supplement: inline-supplementary-material-1 [file inline-supplementary-material-1.pdf]

**Supplementary Table S1.** Distribution of participant's socio-demographic characteristics

| Variables                        | Frequency         | Percentage |
|----------------------------------|-------------------|------------|
| <b>Age (n= 164)</b>              |                   |            |
| Mean $\pm$ SD                    | 38.37 $\pm$ 15.75 |            |
| Range                            | 18-65             |            |
| 18-35                            | 82                | 50         |
| 36-55                            | 50                | 30.5       |
| 56-65                            | 32                | 19.5       |
| <b>Sex (n= 164)</b>              |                   |            |
| Male                             | 95                | 57.9       |
| Female                           | 69                | 42.1       |
| <b>Marital status (n= 164)</b>   |                   |            |
| Unmarried                        | 91                | 55.5       |
| Married                          | 73                | 44.5       |
| <b>Family type (n= 164)</b>      |                   |            |
| Nuclear                          | 68                | 41.5       |
| Joint                            | 96                | 58.5       |
| <b>Education status (n= 164)</b> |                   |            |
| Illiterate                       | 52                | 31.7       |
| Literate                         | 37                | 22.6       |
| Formal education                 | 75                | 45.7       |
| <b>Employment (n= 164)</b>       |                   |            |

|                                                |     |      |
|------------------------------------------------|-----|------|
| Unemployed                                     | 63  | 38.4 |
| Employed                                       | 29  | 17.7 |
| Housemakers                                    | 26  | 15.8 |
| Students                                       | 19  | 11.6 |
| Agriculture                                    | 27  | 16.5 |
| <b>Economic status (n= 164)</b>                |     |      |
| Below poverty                                  | 84  | 51.2 |
| Above poverty                                  | 80  | 48.7 |
| <b>Experience of violence (n= 164)</b>         |     |      |
| Yes                                            | 109 | 66.5 |
| No                                             | 55  | 33.5 |
| <b>Types of violence (n = 109)*</b>            |     |      |
| Physical                                       | 20  | 21.1 |
| Sexual                                         | 6   | 6.3  |
| Mental                                         | 89  | 93.7 |
| Emotional                                      | 94  | 98.9 |
| Deprivation                                    | 54  | 20.5 |
| <b>Involvement in social function (n= 164)</b> |     |      |
| Almost every function                          | 26  | 15.9 |
| Sometimes                                      | 72  | 43.9 |

|                                            |     |      |
|--------------------------------------------|-----|------|
| Never                                      | 66  | 40.2 |
| <b>Assistive device</b> (n= 164)           |     |      |
| Yes                                        | 62  | 37.8 |
| No                                         | 102 | 62.2 |
| <b>Physical activity</b> (n= 164)          |     |      |
| Never                                      | 63  | 38.4 |
| Sometimes                                  | 47  | 28.7 |
| Regular                                    | 54  | 32.9 |
| <b>Substance abuse</b> (n= 164)            |     |      |
| Yes                                        | 47  | 28.7 |
| No                                         | 117 | 71.3 |
| <b>Types of substance abuse*</b><br>(n=47) |     |      |
| Alcohol                                    | 19  | 40.4 |
| Smoking                                    | 46  | 97.9 |
| Other                                      | 2   | 4.2  |

\*=multiple responses recorded where participants provided more than one categories of response.

**Supplementary Table S2.** Association of participant's characteristics with depression

| Variables                 | Depression (%) | No Depression (%) | P-value |
|---------------------------|----------------|-------------------|---------|
| Age (n= 164)              |                |                   |         |
| 18-35                     | 23 (28%)       | 59 (72%)          | 0.001   |
| 36-55                     | 19 (38.8%)     | 30 (61.2%)        |         |
| 56-65                     | 22 (66.7%)     | 11 (33.3%)        |         |
| Sex (n= 164)              |                |                   |         |
| Male                      | 29 (30.5%)     | 66 (69.5%)        | 0.009   |
| Female                    | 35 (50.7%)     | 34 (49.3%)        |         |
| Marital status (n= 164)   |                |                   |         |
| Married                   | 35 (47.9%)     | 38 (52.1%)        | 0.36    |
| Unmarried                 | 29 (31.9%)     | 62 (68.1%)        |         |
| Family type (n= 164)      |                |                   |         |
| Nuclear                   | 27 (39.7%)     | 41 (60.3%)        | 0.88    |
| Joint                     | 37 (38.5%)     | 59 (61.5%)        |         |
| Education status (n= 164) |                |                   |         |
| Illiterate                | 33 (63.5%)     | 19 (36.5%)        | <0.001  |
| Literate                  | 17 (45.9%)     | 20 (54.1%)        |         |
| Formal education          | 14 (18.7%)     | 61 (81.3%)        |         |
| Employment (n= 164)       |                |                   |         |
| Unemployed                | 32 (50.8%)     | 31 (49.2%)        | < 0.001 |

|                                         |            |            |         |
|-----------------------------------------|------------|------------|---------|
| Employed                                | 7 (24.1%)  | 22 (75.9%) |         |
| Housemakers                             | 17 (65.4%) | 9 (34.6%)  |         |
| Students                                | 2 (10.5%)  | 17 (89.5%) |         |
| Agriculture                             | 6 (22.2%)  | 21 (77.8%) |         |
| Economic status (n= 164)                |            |            |         |
| Below poverty                           | 50 (59.5%) | 34 (40.5%) | < 0.001 |
| Above poverty                           | 14 (17.5%) | 66 (82.5%) |         |
| Experience of violence (n= 164)         |            |            |         |
| Yes                                     | 52 (47.7%) | 57 (52.3%) | 0.001   |
| No                                      | 12 (21.8%) | 43 (78.2%) |         |
| Involvement in social function (n= 164) |            |            |         |
| Almost every function                   | 3 (11.5%)  | 23 (88.5%) | <0.001  |
| Sometimes                               | 22 (30.6%) | 50 (69.4%) |         |
| Never                                   | 39 (59.1%) | 27 (40.9%) |         |
| Assistive device (n= 164)               |            |            |         |
| Yes                                     | 24 (38.7%) | 38 (61.3%) | 0.949   |
| No                                      | 40 (39.2%) | 62 (60.8%) |         |
| Physical activity (n= 164)              |            |            |         |
| Never                                   | 35 (55.6%) | 28 (44.4%) | 0.001   |
| Sometimes                               | 17 (36.2%) | 30 (63.8%) |         |
| Regular                                 | 12 (22.2%) | 42 (77.8%) |         |

| Substance abuse (n= 164) |            |            |       |
|--------------------------|------------|------------|-------|
| Yes                      | 23 (48.9%) | 24 (51.1%) | 0.099 |
| No                       | 41 (35%)   | 76 (65%)   |       |
